# Supplementary material for: Experimental VLP vaccine displaying a furin antigen elicits production of autoantibodies and is well tolerated in mice
Source: Royal Society of Chemistry journal article supplement (doi:10.1039/d4na00483c), 2024-01-01
Supplement: d4na00483c2.pdf [file d4na00483c2.pdf]

Index

| 1st immunization experiment=A |            |                                     |           |
|-------------------------------|------------|-------------------------------------|-----------|
| Group number                  | Mouse code | Vaccination group                   | Duplicate |
| 1                             | A1.1       | PBS                                 | No        |
| 1                             | A1.2       | PBS                                 | No        |
| 1                             | A1.3       | PBS                                 | No        |
| 1                             | A1.30      | PBS                                 | No        |
| 1                             | A1.4       | PBS                                 | No        |
| 1                             | A1.5       | PBS                                 | No        |
| 1                             | A1.6       | PBS                                 | No        |
| 2                             | A2.10      | PEED-noro-VLP-SpyCatcher (PCSK9)    | No        |
| 2                             | A2.11      | PEED-noro-VLP-SpyCatcher (PCSK9)    | No        |
| 2                             | A2.12      | PEED-noro-VLP-SpyCatcher (PCSK9)    | No        |
| 2                             | A2.29      | PEED-noro-VLP-SpyCatcher (PCSK9)    | Yes       |
| 2                             | A2.7       | PEED-noro-VLP-SpyCatcher (PCSK9)    | No        |
| 2                             | A2.8       | PEED-noro-VLP-SpyCatcher (PCSK9)    | No        |
| 2                             | A2.9       | PEED-noro-VLP-SpyCatcher (PCSK9)    | No        |
| 3                             | A3.13      | SWG-noro-VLP-SpyCatcher(turin)      | No        |
| 3                             | A3.14      | SWG-noro-VLP-SpyCatcher(turin)      | No        |
| 3                             | A3.15      | SWG-noro-VLP-SpyCatcher(turin)      | No        |
| 3                             | A3.16      | SWG-noro-VLP-SpyCatcher(turin)      | No        |
| 3                             | A3.17      | SWG-noro-VLP-SpyCatcher(turin)      | No        |
| 3                             | A3.18      | SWG-noro-VLP-SpyCatcher(turin)      | Yes       |
| 4                             | A4.19      | SpyTag-noro-VLP                     | No        |
| 4                             | A4.20      | SpyTag-noro-VLP                     | No        |
| 4                             | A4.21      | SpyTag-noro-VLP                     | No        |
| 4                             | A4.22      | SpyTag-noro-VLP                     | No        |
| 4                             | A4.23      | SpyTag-noro-VLP                     | No        |
| 4                             | A4.24      | SpyTag-noro-VLP                     | No        |
| 4                             | A4.28      | SpyTag-noro-VLP                     | Yes       |
| 5                             | A5.25      | DIIG-noro-VLP-SpyCatcher (PCSK9)    | No        |
| 5                             | A5.31      | DIIG-noro-VLP-SpyCatcher (PCSK9)    | Yes       |
| 5                             | A5.33      | DIIG-noro-VLP-SpyCatcher (PCSK9)    | No        |
| 5                             | A5.34      | DIIG-noro-VLP-SpyCatcher (PCSK9)    | No        |
| 5                             | A5.35      | DIIG-noro-VLP-SpyCatcher (PCSK9)    | No        |
| 5                             | A5.36      | DIIG-noro-VLP-SpyCatcher (PCSK9)    | No        |
| 6                             | A6.27      | Pdomain-noro-VLP-SpyCatcher (turin) | No        |
| 6                             | A6.37      | Pdomain-noro-VLP-SpyCatcher (turin) | No        |
| 6                             | A6.38      | Pdomain-noro-VLP-SpyCatcher (turin) | No        |
| 6                             | A6.39      | Pdomain-noro-VLP-SpyCatcher (turin) | No        |
| 6                             | A6.40      | Pdomain-noro-VLP-SpyCatcher (turin) | No        |
| 6                             | A6.41      | Pdomain-noro-VLP-SpyCatcher (turin) | Yes       |
| 6                             | A6.42      | Pdomain-noro-VLP-SpyCatcher (turin) | No        |

| 2nd experiment=B |            |                              |           |
|------------------|------------|------------------------------|-----------|
| Group number     | Mouse code | Vaccination group            | Duplicate |
| 1                | B1.1       | noro+SC-Pdom+AIOH            | No        |
| 1                | B1.10      | noro+SC-Pdom+AIOH            | No        |
| 1                | B1.11      | noro+SC-Pdom+AIOH            | Yes       |
| 1                | B1.3       | noro+SC-Pdom+AIOH            | No        |
| 1                | B1.30      | noro+SC-Pdom+AIOH            | No        |
| 2                | B2.1       | noro+SC-Pdom/SC-Pdomain+AIOH | No        |
| 2                | B2.10      | noro+SC-Pdom/SC-Pdomain+AIOH | No        |
| 2                | B2.11      | noro+SC-Pdom/SC-Pdomain+AIOH | Yes       |
| 2                | B2.3       | noro+SC-Pdom/SC-Pdomain+AIOH | No        |
| 2                | B2.30      | noro+SC-Pdom/SC-Pdomain+AIOH | No        |
| 3                | B3.1       | SpyTag-noro-VLP+AIOH         | No        |
| 3                | B3.10      | SpyTag-noro-VLP+AIOH         | No        |
| 3                | B3.11      | SpyTag-noro-VLP+AIOH         | Yes       |
| 3                | B3.3       | SpyTag-noro-VLP+AIOH         | No        |
| 3                | B3.30      | SpyTag-noro-VLP+AIOH         | No        |
| 4                | B4.1       | SpyCatcher-Pdomain+AIOH      | No        |
| 4                | B4.10      | SpyCatcher-Pdomain+AIOH      | No        |
| 4                | B4.11      | SpyCatcher-Pdomain+AIOH      | Yes       |
| 4                | B4.3       | SpyCatcher-Pdomain+AIOH      | No        |
| 4                | B4.30      | SpyCatcher-Pdomain+AIOH      | No        |
| 5                | B5.1       | TBS+AIOH                     | No        |
| 5                | B5.10      | TBS+AIOH                     | No        |
| 5                | B5.11      | TBS+AIOH                     | Yes       |
| 5                | B5.3       | TBS+AIOH                     | No        |
| 5                | B5.30      | TBS+AIOH                     | No        |

## JFNgamina

| Group                               | Mouse code | Raw signal | Calc. Concent | STD DEV concentration | STD DEV concentration/mean concentration (%) | Detection Range           |
|-------------------------------------|------------|------------|---------------|-----------------------|----------------------------------------------|---------------------------|
| PBS                                 | A1.1       |            | 320           | 0.61                  |                                              | Below Detection Range     |
| PBS                                 | A1.2       |            | 260           | 0.31                  |                                              | Below Fit Curve Range     |
| PBS                                 | A1.3       |            | 220           | 0.21                  |                                              | Below Fit Curve Range     |
| PBS                                 | A1.30      |            | 279           | 0.41                  |                                              | Below Fit Curve Range     |
| PBS                                 | A1.4       |            | 292           | 0.47                  |                                              | Below Detection Range     |
| PBS                                 | A1.5       |            | 330           | 0.66                  |                                              | In Detection Range        |
| PBS                                 | A1.6       |            | 247           | 0.25                  |                                              | Below Fit Curve Range     |
| PEED-noro-VLP-SpyCatcher (PCSK9)    | A2.10      |            | 286           | 0.44                  |                                              | Below Detection Range     |
| PEED-noro-VLP-SpyCatcher (PCSK9)    | A2.11      |            | 278           | 0.40                  |                                              | Below Fit Curve Range     |
| PEED-noro-VLP-SpyCatcher (PCSK9)    | A2.12      |            | 243           | 0.22                  |                                              | Below Fit Curve Range     |
| PEED-noro-VLP-SpyCatcher (PCSK9)    | A2.29      |            | 278           | 0.40                  | 0.01                                         | 2.5 Below Fit Curve Range |
| PEED-noro-VLP-SpyCatcher (PCSK9)    | A2.7       |            | 245           | 0.24                  |                                              | Below Fit Curve Range     |
| PEED-noro-VLP-SpyCatcher (PCSK9)    | A2.8       |            | 355           | 0.78                  |                                              | In Detection Range        |
| PEED-noro-VLP-SpyCatcher (PCSK9)    | A2.9       |            | 279           | 0.41                  |                                              | Below Fit Curve Range     |
| SWG-noro-VLP-SpyCatcher(furin)      | A3.13      |            | 245           | 0.24                  |                                              | Below Fit Curve Range     |
| SWG-noro-VLP-SpyCatcher(furin)      | A3.14      |            | 459           | 1.26                  |                                              | In Detection Range        |
| SWG-noro-VLP-SpyCatcher(furin)      | A3.15      |            | 302           | 0.52                  |                                              | Below Detection Range     |
| SWG-noro-VLP-SpyCatcher(furin)      | A3.16      |            | 403           | 1.00                  |                                              | In Detection Range        |
| SWG-noro-VLP-SpyCatcher(furin)      | A3.17      |            | 463           | 1.28                  |                                              | In Detection Range        |
| SWG-noro-VLP-SpyCatcher(furin)      | A3.18      |            | 274           | 0.38                  | 0.03                                         | 6.5 Below Fit Curve Range |
| SpyTag-noro-VLP                     | A4.19      |            | 259           | 0.31                  |                                              | Below Fit Curve Range     |
| SpyTag-noro-VLP                     | A4.20      |            | 278           | 0.40                  |                                              | Below Fit Curve Range     |
| SpyTag-noro-VLP                     | A4.21      |            | 244           | 0.23                  |                                              | Below Fit Curve Range     |
| SpyTag-noro-VLP                     | A4.22      |            | 168           | NaN                   |                                              | Below Fit Curve Range     |
| SpyTag-noro-VLP                     | A4.23      |            | 208           | 0.03                  |                                              | Below Fit Curve Range     |
| SpyTag-noro-VLP                     | A4.24      |            | 476           | 1.34                  |                                              | In Detection Range        |
| SpyTag-noro-VLP                     | A4.28      |            | 295           | 0.49                  | 0.03                                         | 7.1 Below Detection Range |
| DIIG-noro-VLP-SpyCatcher (PCSK9)    | A5.25      |            | 427           | 1.11                  |                                              | In Detection Range        |
| DIIG-noro-VLP-SpyCatcher (PCSK9)    | A5.31      |            | 433           | 1.14                  | 0.07                                         | 6.5 In Detection Range    |
| DIIG-noro-VLP-SpyCatcher (PCSK9)    | A5.33      |            | 298           | 0.50                  |                                              | Below Detection Range     |
| DIIG-noro-VLP-SpyCatcher (PCSK9)    | A5.34      |            | 354           | 0.77                  |                                              | In Detection Range        |
| DIIG-noro-VLP-SpyCatcher (PCSK9)    | A5.35      |            | 317           | 0.59                  |                                              | Below Detection Range     |
| DIIG-noro-VLP-SpyCatcher (PCSK9)    | A5.36      |            | 316           | 0.59                  |                                              | Below Detection Range     |
| Pdomain-noro-VLP-SpyCatcher (furin) | A6.27      |            | 380           | 0.89                  |                                              | In Detection Range        |
| Pdomain-noro-VLP-SpyCatcher (furin) | A6.37      |            | 333           | 0.67                  |                                              | In Detection Range        |
| Pdomain-noro-VLP-SpyCatcher (furin) | A6.38      |            | 332           | 0.67                  |                                              | In Detection Range        |
| Pdomain-noro-VLP-SpyCatcher (furin) | A6.39      |            | 320           | 0.61                  |                                              | Below Detection Range     |
| Pdomain-noro-VLP-SpyCatcher (furin) | A6.40      |            | 317           | 0.59                  |                                              | Below Detection Range     |
| Pdomain-noro-VLP-SpyCatcher (furin) | A6.41      |            | 299           | 0.51                  | 0.01                                         | 1.9 Below Detection Range |
| Pdomain-noro-VLP-SpyCatcher (furin) | A6.42      |            | 264           | 0.33                  |                                              | Below Fit Curve Range     |
| noro+SC-Pdom+AIOH                   | B1.1       |            | 330           | 0.66                  |                                              | In Detection Range        |
| noro+SC-Pdom+AIOH                   | B1.10      |            | 218           | 0.09                  |                                              | Below Fit Curve Range     |
| noro+SC-Pdom+AIOH                   | B1.11      |            | 362           | 0.81                  | 0.00                                         | 0.3 In Detection Range    |
| noro+SC-Pdom+AIOH                   | B1.3       |            | 428           | 1.12                  |                                              | In Detection Range        |
| noro+SC-Pdom+AIOH                   | B1.30      |            | 377           | 0.88                  |                                              | In Detection Range        |
| noro+SC-Pdom/SC-Pdomain+AIOH        | B2.1       |            | 292           | 0.47                  |                                              | Below Detection Range     |
| noro+SC-Pdom/SC-Pdomain+AIOH        | B2.10      |            | 347           | 0.74                  |                                              | In Detection Range        |
| noro+SC-Pdom/SC-Pdomain+AIOH        | B2.11      |            | 366           | 0.83                  | 0.08                                         | 9.4 In Detection Range    |
| noro+SC-Pdom/SC-Pdomain+AIOH        | B2.3       |            | 261           | 0.32                  |                                              | Below Fit Curve Range     |
| noro+SC-Pdom/SC-Pdomain+AIOH        | B2.30      |            | 403           | 1.00                  |                                              | In Detection Range        |
| SpyTag-noro-VLP+AIOH                | B3.1       |            | 281           | 0.42                  |                                              | Below Fit Curve Range     |
| SpyTag-noro-VLP+AIOH                | B3.10      |            | 283           | 0.43                  |                                              | Below Fit Curve Range     |
| SpyTag-noro-VLP+AIOH                | B3.11      |            | 281           | 0.42                  | 0.04                                         | 9.5 Below Fit Curve Range |
| SpyTag-noro-VLP+AIOH                | B3.3       |            | 375           | 0.87                  |                                              | In Detection Range        |
| SpyTag-noro-VLP+AIOH                | B3.30      |            | 290           | 0.46                  |                                              | Below Detection Range     |
| SpyCatcher-Pdomain+AIOH             | B4.1       |            | 409           | 1.03                  |                                              | In Detection Range        |
| SpyCatcher-Pdomain+AIOH             | B4.10      |            | 260           | 0.31                  |                                              | Below Fit Curve Range     |
| SpyCatcher-Pdomain+AIOH             | B4.11      |            | 378           | 0.88                  | 0.03                                         | 3.7 In Detection Range    |
| SpyCatcher-Pdomain+AIOH             | B4.3       |            | 326           | 0.64                  |                                              | In Detection Range        |
| SpyCatcher-Pdomain+AIOH             | B4.30      |            | 310           | 0.56                  |                                              | Below Detection Range     |
| TBS+AIOH                            | B5.1       |            | 294           | 0.48                  |                                              | Below Detection Range     |
| TBS+AIOH                            | B5.10      |            | 252           | 0.27                  |                                              | Below Fit Curve Range     |
| TBS+AIOH                            | B5.11      |            | 403           | 1.00                  | 0.02                                         | 2.1 In Detection Range    |
| TBS+AIOH                            | B5.3       |            | 332           | 0.67                  |                                              | In Detection Range        |

IL-10

| Group                               | Mouse code | Raw signal | Calc. Concent | STD DEV concentration | STD DEV concentration/mean concentration (%) | Detection Range        |
|-------------------------------------|------------|------------|---------------|-----------------------|----------------------------------------------|------------------------|
| PBS                                 | A1.1       |            | 1034          | 3.39                  |                                              | In Detection Range     |
| PBS                                 | A1.2       |            | 1024          | 3.31                  |                                              | In Detection Range     |
| PBS                                 | A1.3       |            | 614           | 0.37                  |                                              | Below Fit Curve Range  |
| PBS                                 | A1.30      |            | 868           | 2.16                  |                                              | In Detection Range     |
| PBS                                 | A1.4       |            | 855           | 2.06                  |                                              | In Detection Range     |
| PBS                                 | A1.5       |            | 875           | 2.21                  |                                              | In Detection Range     |
| PBS                                 | A1.6       |            | 854           | 2.06                  |                                              | In Detection Range     |
| PEED-noro-VLP-SpyCatcher (PCSK9)    | A2.10      |            | 764           | 1.37                  |                                              | Below Fit Curve Range  |
| PEED-noro-VLP-SpyCatcher (PCSK9)    | A2.11      |            | 1200          | 4.59                  |                                              | In Detection Range     |
| PEED-noro-VLP-SpyCatcher (PCSK9)    | A2.12      |            | 1058          | 3.56                  |                                              | In Detection Range     |
| PEED-noro-VLP-SpyCatcher (PCSK9)    | A2.29      |            | 1084          | 3.75                  | 0.05                                         | 1.4 In Detection Range |
| PEED-noro-VLP-SpyCatcher (PCSK9)    | A2.7       |            | 633           | 0.34                  |                                              | Below Fit Curve Range  |
| PEED-noro-VLP-SpyCatcher (PCSK9)    | A2.8       |            | 1110          | 3.94                  |                                              | In Detection Range     |
| PEED-noro-VLP-SpyCatcher (PCSK9)    | A2.9       |            | 925           | 2.59                  |                                              | In Detection Range     |
| SWG-noro-VLP-SpyCatcher(furin)      | A3.13      |            | 1004          | 3.17                  |                                              | In Detection Range     |
| SWG-noro-VLP-SpyCatcher(furin)      | A3.14      |            | 1179          | 4.44                  |                                              | In Detection Range     |
| SWG-noro-VLP-SpyCatcher(furin)      | A3.15      |            | 1187          | 4.50                  |                                              | In Detection Range     |
| SWG-noro-VLP-SpyCatcher(furin)      | A3.16      |            | 1481          | 6.60                  |                                              | In Detection Range     |
| SWG-noro-VLP-SpyCatcher(furin)      | A3.17      |            | 1028          | 3.34                  |                                              | In Detection Range     |
| SWG-noro-VLP-SpyCatcher(furin)      | A3.18      |            | 892           | 2.34                  | 0.10                                         | 4.3 In Detection Range |
| SpyTag-noro-VLP                     | A4.19      |            | 1011          | 3.22                  |                                              | In Detection Range     |
| SpyTag-noro-VLP                     | A4.20      |            | 951           | 2.78                  |                                              | In Detection Range     |
| SpyTag-noro-VLP                     | A4.21      |            | 908           | 2.46                  |                                              | In Detection Range     |
| SpyTag-noro-VLP                     | A4.22      |            | 513           | NaN                   |                                              | Below Fit Curve Range  |
| SpyTag-noro-VLP                     | A4.23      |            | 794           | 1.60                  |                                              | Below Detection Range  |
| SpyTag-noro-VLP                     | A4.24      |            | 1127          | 4.07                  |                                              | In Detection Range     |
| SpyTag-noro-VLP                     | A4.28      |            | 1171          | 4.38                  | 0.06                                         | 1.3 In Detection Range |
| DIIG-noro-VLP-SpyCatcher (PCSK9)    | A5.25      |            | 1310          | 5.38                  |                                              | In Detection Range     |
| DIIG-noro-VLP-SpyCatcher (PCSK9)    | A5.31      |            | 1604          | 7.46                  | 0.32                                         | 4.3 In Detection Range |
| DIIG-noro-VLP-SpyCatcher (PCSK9)    | A5.33      |            | 1449          | 6.37                  |                                              | In Detection Range     |
| DIIG-noro-VLP-SpyCatcher (PCSK9)    | A5.34      |            | 1065          | 3.61                  |                                              | In Detection Range     |
| DIIG-noro-VLP-SpyCatcher (PCSK9)    | A5.35      |            | 1027          | 3.34                  |                                              | In Detection Range     |
| DIIG-noro-VLP-SpyCatcher (PCSK9)    | A5.36      |            | 1088          | 3.78                  |                                              | In Detection Range     |
| Pdomain-noro-VLP-SpyCatcher (furin) | A6.27      |            | 1118          | 4.00                  |                                              | In Detection Range     |
| Pdomain-noro-VLP-SpyCatcher (furin) | A6.37      |            | 1193          | 4.54                  |                                              | In Detection Range     |
| Pdomain-noro-VLP-SpyCatcher (furin) | A6.38      |            | 1264          | 5.05                  |                                              | In Detection Range     |
| Pdomain-noro-VLP-SpyCatcher (furin) | A6.39      |            | 1020          | 3.29                  |                                              | In Detection Range     |
| Pdomain-noro-VLP-SpyCatcher (furin) | A6.40      |            | 3075          | 17.52                 |                                              | In Detection Range     |
| Pdomain-noro-VLP-SpyCatcher (furin) | A6.41      |            | 1092          | 3.81                  | 0.05                                         | 1.4 In Detection Range |
| Pdomain-noro-VLP-SpyCatcher (furin) | A6.42      |            | 791           | 1.58                  |                                              | Below Detection Range  |
| noro+SC-Pdom+AIOH                   | B1.1       |            | 875           | 2.21                  |                                              | In Detection Range     |
| noro+SC-Pdom+AIOH                   | B1.10      |            | 967           | 2.90                  |                                              | In Detection Range     |
| noro+SC-Pdom+AIOH                   | B1.11      |            | 978.5         | 2.98                  | 0.08                                         | 2.6 In Detection Range |
| noro+SC-Pdom+AIOH                   | B1.3       |            | 1365          | 5.77                  |                                              | In Detection Range     |
| noro+SC-Pdom+AIOH                   | B1.30      |            | 992           | 3.08                  |                                              | In Detection Range     |
| noro+SC-Pdom/SC-Pdomain+AIOH        | B2.1       |            | 844           | 1.98                  |                                              | In Detection Range     |
| noro+SC-Pdom/SC-Pdomain+AIOH        | B2.10      |            | 905           | 2.44                  |                                              | In Detection Range     |
| noro+SC-Pdom/SC-Pdomain+AIOH        | B2.11      |            | 924.5         | 2.58                  | 0.21                                         | 8.2 In Detection Range |
| noro+SC-Pdom/SC-Pdomain+AIOH        | B2.3       |            | 858           | 2.09                  |                                              | In Detection Range     |
| noro+SC-Pdom/SC-Pdomain+AIOH        | B2.30      |            | 1119          | 4.01                  |                                              | In Detection Range     |
| SpyTag-noro-VLP+AIOH                | B3.1       |            | 1033          | 3.38                  |                                              | In Detection Range     |
| SpyTag-noro-VLP+AIOH                | B3.10      |            | 862           | 2.12                  |                                              | In Detection Range     |
| SpyTag-noro-VLP+AIOH                | B3.11      |            | 1134          | 4.12                  | 0.11                                         | 2.6 In Detection Range |
| SpyTag-noro-VLP+AIOH                | B3.3       |            | 1165          | 4.34                  |                                              | In Detection Range     |
| SpyTag-noro-VLP+AIOH                | B3.30      |            | 934           | 2.65                  |                                              | In Detection Range     |
| SpyCatcher-Pdomain+AIOH             | B4.1       |            | 926           | 2.59                  |                                              | In Detection Range     |
| SpyCatcher-Pdomain+AIOH             | B4.10      |            | 937           | 2.67                  |                                              | In Detection Range     |
| SpyCatcher-Pdomain+AIOH             | B4.11      |            | 1102          | 3.88                  | 0.04                                         | 0.9 In Detection Range |
| SpyCatcher-Pdomain+AIOH             | B4.3       |            | 983           | 3.01                  |                                              | In Detection Range     |
| SpyCatcher-Pdomain+AIOH             | B4.30      |            | 897           | 2.38                  |                                              | In Detection Range     |
| TBS+AIOH                            | B5.1       |            | 964           | 2.87                  |                                              | In Detection Range     |
| TBS+AIOH                            | B5.10      |            | 1129          | 4.08                  |                                              | In Detection Range     |
| TBS+AIOH                            | B5.11      |            | 1081          | 3.73                  | 0.01                                         | 0.4 In Detection Range |
| TBS+AIOH                            | B5.3       |            | 1125          | 4.05                  |                                              | In Detection Range     |

IL-12p70

| Group                               | Mouse code | Raw signal | Calc. Concent | STD DEV concentration | STD DEV concentration/mean concentration (%) | Detection Range            |
|-------------------------------------|------------|------------|---------------|-----------------------|----------------------------------------------|----------------------------|
| PBS                                 | A1.1       |            | 361           | NaN                   |                                              | Below FIR Curve Range      |
| PBS                                 | A1.2       |            | 414           | NaN                   |                                              | Below FIR Curve Range      |
| PBS                                 | A1.3       |            | 315           | NaN                   |                                              | Below FIR Curve Range      |
| PBS                                 | A1.30      |            | 325           | NaN                   |                                              | Below FIR Curve Range      |
| PBS                                 | A1.4       |            | 348           | NaN                   |                                              | Below FIR Curve Range      |
| PBS                                 | A1.5       |            | 330           | NaN                   |                                              | Below FIR Curve Range      |
| PBS                                 | A1.6       |            | 330           | NaN                   |                                              | Below FIR Curve Range      |
| PEED-noro-VLP-SpyCatcher (PCSK9)    | A2.10      |            | 370           | NaN                   |                                              | Below FIR Curve Range      |
| PEED-noro-VLP-SpyCatcher (PCSK9)    | A2.11      |            | 351           | NaN                   |                                              | Below FIR Curve Range      |
| PEED-noro-VLP-SpyCatcher (PCSK9)    | A2.12      |            | 327           | NaN                   |                                              | Below FIR Curve Range      |
| PEED-noro-VLP-SpyCatcher (PCSK9)    | A2.29      |            | 352           | NaN                   | NaN                                          | NaN Below FIR Curve Range  |
| PEED-noro-VLP-SpyCatcher (PCSK9)    | A2.7       |            | 349           | NaN                   |                                              | Below FIR Curve Range      |
| PEED-noro-VLP-SpyCatcher (PCSK9)    | A2.8       |            | 390           | NaN                   |                                              | Below FIR Curve Range      |
| PEED-noro-VLP-SpyCatcher (PCSK9)    | A2.9       |            | 377           | NaN                   |                                              | Below FIR Curve Range      |
| SWG-noro-VLP-SpyCatcher(furin)      | A3.13      |            | 318           | NaN                   |                                              | Below FIR Curve Range      |
| SWG-noro-VLP-SpyCatcher(furin)      | A3.14      |            | 319           | NaN                   |                                              | Below FIR Curve Range      |
| SWG-noro-VLP-SpyCatcher(furin)      | A3.15      |            | 335           | NaN                   |                                              | Below FIR Curve Range      |
| SWG-noro-VLP-SpyCatcher(furin)      | A3.16      |            | 348           | NaN                   |                                              | Below FIR Curve Range      |
| SWG-noro-VLP-SpyCatcher(furin)      | A3.17      |            | 351           | NaN                   |                                              | Below FIR Curve Range      |
| SWG-noro-VLP-SpyCatcher(furin)      | A3.18      |            | 347           | NaN                   | NaN                                          | NaN Below FIR Curve Range  |
| SpyTag-noro-VLP                     | A4.19      |            | 351           | NaN                   |                                              | Below FIR Curve Range      |
| SpyTag-noro-VLP                     | A4.20      |            | 457           | 13.35                 |                                              | Below FIR Curve Range      |
| SpyTag-noro-VLP                     | A4.21      |            | 338           | NaN                   |                                              | Below FIR Curve Range      |
| SpyTag-noro-VLP                     | A4.22      |            | 351           | NaN                   |                                              | Below FIR Curve Range      |
| SpyTag-noro-VLP                     | A4.23      |            | 342           | NaN                   |                                              | Below FIR Curve Range      |
| SpyTag-noro-VLP                     | A4.24      |            | 683           | 59.61                 |                                              | In Detection Range         |
| SpyTag-noro-VLP                     | A4.28      |            | 352           | NaN                   | NaN                                          | NaN Below FIR Curve Range  |
| DIIG-noro-VLP-SpyCatcher (PCSK9)    | A5.25      |            | 348           | NaN                   |                                              | Below FIR Curve Range      |
| DIIG-noro-VLP-SpyCatcher (PCSK9)    | A5.31      |            | 371           | NaN                   | NaN                                          | NaN Below FIR Curve Range  |
| DIIG-noro-VLP-SpyCatcher (PCSK9)    | A5.33      |            | 365           | NaN                   |                                              | Below FIR Curve Range      |
| DIIG-noro-VLP-SpyCatcher (PCSK9)    | A5.34      |            | 346           | NaN                   |                                              | Below FIR Curve Range      |
| DIIG-noro-VLP-SpyCatcher (PCSK9)    | A5.35      |            | 356           | NaN                   |                                              | Below FIR Curve Range      |
| DIIG-noro-VLP-SpyCatcher (PCSK9)    | A5.36      |            | 377           | NaN                   |                                              | Below FIR Curve Range      |
| Pdomain-noro-VLP-SpyCatcher (furin) | A6.27      |            | 330           | NaN                   |                                              | Below FIR Curve Range      |
| Pdomain-noro-VLP-SpyCatcher (furin) | A6.37      |            | 338           | NaN                   |                                              | Below FIR Curve Range      |
| Pdomain-noro-VLP-SpyCatcher (furin) | A6.38      |            | 354           | NaN                   |                                              | Below FIR Curve Range      |
| Pdomain-noro-VLP-SpyCatcher (furin) | A6.39      |            | 313           | NaN                   |                                              | Below FIR Curve Range      |
| Pdomain-noro-VLP-SpyCatcher (furin) | A6.40      |            | 381           | NaN                   |                                              | Below FIR Curve Range      |
| Pdomain-noro-VLP-SpyCatcher (furin) | A6.41      |            | 353           | NaN                   | NaN                                          | NaN Below FIR Curve Range  |
| Pdomain-noro-VLP-SpyCatcher (furin) | A6.42      |            | 325           | NaN                   |                                              | Below FIR Curve Range      |
| noro+SC-Pdom+AIOH                   | B1.1       |            | 358           | NaN                   |                                              | Below FIR Curve Range      |
| noro+SC-Pdom+AIOH                   | B1.10      |            | 355           | NaN                   |                                              | Below FIR Curve Range      |
| noro+SC-Pdom+AIOH                   | B1.11      |            | 337           | NaN                   | NaN                                          | NaN Below FIR Curve Range  |
| noro+SC-Pdom+AIOH                   | B1.3       |            | 367           | NaN                   |                                              | Below FIR Curve Range      |
| noro+SC-Pdom+AIOH                   | B1.30      |            | 376           | NaN                   |                                              | Below FIR Curve Range      |
| noro+SC-Pdom/SC-Pdomain+AIOH        | B2.1       |            | 343           | NaN                   |                                              | Below FIR Curve Range      |
| noro+SC-Pdom/SC-Pdomain+AIOH        | B2.10      |            | 333           | NaN                   |                                              | Below FIR Curve Range      |
| noro+SC-Pdom/SC-Pdomain+AIOH        | B2.11      |            | 468           | 16.04                 | 1.64                                         | 10.2 Below Detection Range |
| noro+SC-Pdom/SC-Pdomain+AIOH        | B2.3       |            | 347           | NaN                   |                                              | Below FIR Curve Range      |
| noro+SC-Pdom/SC-Pdomain+AIOH        | B2.30      |            | 341           | NaN                   |                                              | Below FIR Curve Range      |
| SpyTag-noro-VLP+AIOH                | B3.1       |            | 336           | NaN                   |                                              | Below FIR Curve Range      |
| SpyTag-noro-VLP+AIOH                | B3.10      |            | 336           | NaN                   |                                              | Below FIR Curve Range      |
| SpyTag-noro-VLP+AIOH                | B3.11      |            | 363           | NaN                   | NaN                                          | NaN Below FIR Curve Range  |
| SpyTag-noro-VLP+AIOH                | B3.3       |            | 332           | NaN                   |                                              | Below FIR Curve Range      |
| SpyTag-noro-VLP+AIOH                | B3.30      |            | 364           | NaN                   |                                              | Below FIR Curve Range      |
| SpyCatcher-Pdomain+AIOH             | B4.1       |            | 331           | NaN                   |                                              | Below FIR Curve Range      |
| SpyCatcher-Pdomain+AIOH             | B4.10      |            | 303           | NaN                   |                                              | Below FIR Curve Range      |
| SpyCatcher-Pdomain+AIOH             | B4.11      |            | 393           | NaN                   | NaN                                          | NaN Below FIR Curve Range  |
| SpyCatcher-Pdomain+AIOH             | B4.3       |            | 311           | NaN                   |                                              | Below FIR Curve Range      |
| SpyCatcher-Pdomain+AIOH             | B4.30      |            | 352           | NaN                   |                                              | Below FIR Curve Range      |
| TBS+AIOH                            | B5.1       |            | 318           | NaN                   |                                              | Below FIR Curve Range      |
| TBS+AIOH                            | B5.10      |            | 348           | NaN                   |                                              | Below FIR Curve Range      |
| TBS+AIOH                            | B5.11      |            | 333           | NaN                   | NaN                                          | NaN Below FIR Curve Range  |
| TBS+AIOH                            | B5.3       |            | 346           | NaN                   |                                              | Below FIR Curve Range      |

IL-1beta

| Group                               | Mouse code | Raw signal | Calc. Concent | STD DEV concentration | STD DEV concentration/mean concentration (%) | Detection Range            |
|-------------------------------------|------------|------------|---------------|-----------------------|----------------------------------------------|----------------------------|
| PBS                                 | A1.1       |            | 449           | 0.85                  |                                              | Below Detection Range      |
| PBS                                 | A1.2       |            | 346           | 0.53                  |                                              | Below FIR Curve Range      |
| PBS                                 | A1.3       |            | 247           | 0.45                  |                                              | Below FIR Curve Range      |
| PBS                                 | A1.30      |            | 317           | 0.44                  |                                              | Below FIR Curve Range      |
| PBS                                 | A1.4       |            | 1526          | 4.17                  |                                              | In Detection Range         |
| PBS                                 | A1.5       |            | 386           | 0.65                  |                                              | Below FIR Curve Range      |
| PBS                                 | A1.6       |            | 902           | 2.26                  |                                              | In Detection Range         |
| PEED-noro-VLP-SpyCatcher (PCSK9)    | A2.10      |            | 408           | 0.72                  |                                              | Below FIR Curve Range      |
| PEED-noro-VLP-SpyCatcher (PCSK9)    | A2.11      |            | 406           | 0.72                  |                                              | Below FIR Curve Range      |
| PEED-noro-VLP-SpyCatcher (PCSK9)    | A2.12      |            | 601           | 1.32                  |                                              | In Detection Range         |
| PEED-noro-VLP-SpyCatcher (PCSK9)    | A2.29      |            | 351           | 0.54                  | 0.01                                         | 2.6 Below FIR Curve Range  |
| PEED-noro-VLP-SpyCatcher (PCSK9)    | A2.7       |            | 308           | 0.41                  |                                              | Below FIR Curve Range      |
| PEED-noro-VLP-SpyCatcher (PCSK9)    | A2.8       |            | 403           | 0.71                  |                                              | Below FIR Curve Range      |
| PEED-noro-VLP-SpyCatcher (PCSK9)    | A2.9       |            | 495           | 0.99                  |                                              | In Detection Range         |
| SWG-noro-VLP-SpyCatcher(furin)      | A3.13      |            | 336           | 0.50                  |                                              | Below FIR Curve Range      |
| SWG-noro-VLP-SpyCatcher(furin)      | A3.14      |            | 285           | 0.34                  |                                              | Below FIR Curve Range      |
| SWG-noro-VLP-SpyCatcher(furin)      | A3.15      |            | 430           | 0.79                  |                                              | Below Detection Range      |
| SWG-noro-VLP-SpyCatcher(furin)      | A3.16      |            | 1270          | 3.39                  |                                              | In Detection Range         |
| SWG-noro-VLP-SpyCatcher(furin)      | A3.17      |            | 923           | 2.32                  |                                              | In Detection Range         |
| SWG-noro-VLP-SpyCatcher(furin)      | A3.18      |            | 358           | 0.57                  | 0.01                                         | 1.9 Below FIR Curve Range  |
| SpyTag-noro-VLP                     | A4.19      |            | 362           | 0.58                  |                                              | Below FIR Curve Range      |
| SpyTag-noro-VLP                     | A4.20      |            | 307           | 0.41                  |                                              | Below FIR Curve Range      |
| SpyTag-noro-VLP                     | A4.21      |            | 1173          | 3.09                  |                                              | In Detection Range         |
| SpyTag-noro-VLP                     | A4.22      |            | 146           | NaN                   |                                              | Below FIR Curve Range      |
| SpyTag-noro-VLP                     | A4.23      |            | 1110          | 2.90                  |                                              | In Detection Range         |
| SpyTag-noro-VLP                     | A4.24      |            | 572           | 1.23                  |                                              | In Detection Range         |
| SpyTag-noro-VLP                     | A4.28      |            | 390           | 0.67                  | 0.02                                         | 2.8 Below FIR Curve Range  |
| DIIG-noro-VLP-SpyCatcher (PCSK9)    | A5.25      |            | 1246          | 3.31                  |                                              | In Detection Range         |
| DIIG-noro-VLP-SpyCatcher (PCSK9)    | A5.31      |            | 337           | 0.50                  | 0.03                                         | 6.6 Below FIR Curve Range  |
| DIIG-noro-VLP-SpyCatcher (PCSK9)    | A5.33      |            | 369           | 0.60                  |                                              | Below FIR Curve Range      |
| DIIG-noro-VLP-SpyCatcher (PCSK9)    | A5.34      |            | 299           | 0.38                  |                                              | Below FIR Curve Range      |
| DIIG-noro-VLP-SpyCatcher (PCSK9)    | A5.35      |            | 348           | 0.54                  |                                              | Below FIR Curve Range      |
| DIIG-noro-VLP-SpyCatcher (PCSK9)    | A5.36      |            | 309           | 0.41                  |                                              | Below FIR Curve Range      |
| Pdomain-noro-VLP-SpyCatcher (furin) | A6.27      |            | 421           | 0.76                  |                                              | Below FIR Curve Range      |
| Pdomain-noro-VLP-SpyCatcher (furin) | A6.37      |            | 370           | 0.60                  |                                              | Below FIR Curve Range      |
| Pdomain-noro-VLP-SpyCatcher (furin) | A6.38      |            | 286           | 0.34                  |                                              | Below FIR Curve Range      |
| Pdomain-noro-VLP-SpyCatcher (furin) | A6.39      |            | 455           | 0.87                  |                                              | Below Detection Range      |
| Pdomain-noro-VLP-SpyCatcher (furin) | A6.40      |            | 341           | 0.51                  |                                              | Below FIR Curve Range      |
| Pdomain-noro-VLP-SpyCatcher (furin) | A6.41      |            | 296           | 0.37                  | 0.04                                         | 10.1 Below FIR Curve Range |
| Pdomain-noro-VLP-SpyCatcher (furin) | A6.42      |            | 396           | 0.69                  |                                              | Below FIR Curve Range      |
| noro+SC-Pdom+AIOH                   | B1.1       |            | 798           | 1.93                  |                                              | In Detection Range         |
| noro+SC-Pdom+AIOH                   | B1.10      |            | 1158          | 3.04                  |                                              | In Detection Range         |
| noro+SC-Pdom+AIOH                   | B1.11      |            | 1373          | 3.70                  | 0.16                                         | 4.3 In Detection Range     |
| noro+SC-Pdom+AIOH                   | B1.3       |            | 1838          | 5.13                  |                                              | In Detection Range         |
| noro+SC-Pdom+AIOH                   | B1.30      |            | 1053          | 2.72                  |                                              | In Detection Range         |
| noro+SC-Pdom/SC-Pdomain+AIOH        | B2.1       |            | 1080          | 2.80                  |                                              | In Detection Range         |
| noro+SC-Pdom/SC-Pdomain+AIOH        | B2.10      |            | 1165          | 3.07                  |                                              | In Detection Range         |
| noro+SC-Pdom/SC-Pdomain+AIOH        | B2.11      |            | 1042          | 2.69                  | 0.10                                         | 3.7 In Detection Range     |
| noro+SC-Pdom/SC-Pdomain+AIOH        | B2.3       |            | 1200          | 3.17                  |                                              | In Detection Range         |
| noro+SC-Pdom/SC-Pdomain+AIOH        | B2.30      |            | 1285          | 3.43                  |                                              | In Detection Range         |
| SpyTag-noro-VLP+AIOH                | B3.1       |            | 1285          | 3.43                  |                                              | In Detection Range         |
| SpyTag-noro-VLP+AIOH                | B3.10      |            | 875           | 2.17                  |                                              | In Detection Range         |
| SpyTag-noro-VLP+AIOH                | B3.11      |            | 968           | 2.46                  | 0.04                                         | 1.6 In Detection Range     |
| SpyTag-noro-VLP+AIOH                | B3.3       |            | 1198          | 3.17                  |                                              | In Detection Range         |
| SpyTag-noro-VLP+AIOH                | B3.30      |            | 1089          | 2.83                  |                                              | In Detection Range         |
| SpyCatcher-Pdomain+AIOH             | B4.1       |            | 1107          | 2.89                  |                                              | In Detection Range         |
| SpyCatcher-Pdomain+AIOH             | B4.10      |            | 1103          | 2.87                  |                                              | In Detection Range         |
| SpyCatcher-Pdomain+AIOH             | B4.11      |            | 1199          | 3.17                  | 0.02                                         | 0.5 In Detection Range     |
| SpyCatcher-Pdomain+AIOH             | B4.3       |            | 890           | 2.22                  |                                              | In Detection Range         |
| SpyCatcher-Pdomain+AIOH             | B4.30      |            | 1434          | 3.89                  |                                              | In Detection Range         |
| TBS+AIOH                            | B5.1       |            | 981           | 2.50                  |                                              | In Detection Range         |
| TBS+AIOH                            | B5.10      |            | 1301          | 3.48                  |                                              | In Detection Range         |
| TBS+AIOH                            | B5.11      |            | 1452          | 3.95                  | 0.34                                         | 8.6 In Detection Range     |
| TBS+AIOH                            | B5.3       |            | 1324          | 3.55                  |                                              | In Detection Range         |

IL-2

| Group                               | Mouse code | Raw signal | Calc. Concent | STD DEV concentration | STD DEV concentration/mean concentration (%) | Detection Range            |
|-------------------------------------|------------|------------|---------------|-----------------------|----------------------------------------------|----------------------------|
| PBS                                 | A1.1       |            | 294           | 0.75                  |                                              | Below FIR Curve Range      |
| PBS                                 | A1.2       |            | 294           | 0.75                  |                                              | Below FIR Curve Range      |
| PBS                                 | A1.3       |            | 233           | NaN                   |                                              | Below FIR Curve Range      |
| PBS                                 | A1.30      |            | 280           | 0.52                  |                                              | Below FIR Curve Range      |
| PBS                                 | A1.4       |            | 299           | 0.83                  |                                              | Below FIR Curve Range      |
| PBS                                 | A1.5       |            | 252           | 0.04                  |                                              | Below FIR Curve Range      |
| PBS                                 | A1.6       |            | 361           | 1.79                  |                                              | In Detection Range         |
| PEED-noro-VLP-SpyCatcher (PCSK9)    | A2.10      |            | 288           | 0.65                  |                                              | Below FIR Curve Range      |
| PEED-noro-VLP-SpyCatcher (PCSK9)    | A2.11      |            | 245           | NaN                   |                                              | Below FIR Curve Range      |
| PEED-noro-VLP-SpyCatcher (PCSK9)    | A2.12      |            | 272           | 0.39                  |                                              | Below FIR Curve Range      |
| PEED-noro-VLP-SpyCatcher (PCSK9)    | A2.29      |            | 252           | 0.30                  | 0.00                                         | 0.0 Below FIR Curve Range  |
| PEED-noro-VLP-SpyCatcher (PCSK9)    | A2.7       |            | 247           | NaN                   |                                              | Below FIR Curve Range      |
| PEED-noro-VLP-SpyCatcher (PCSK9)    | A2.8       |            | 266           | 0.29                  |                                              | Below FIR Curve Range      |
| PEED-noro-VLP-SpyCatcher (PCSK9)    | A2.9       |            | 266           | 0.29                  |                                              | Below FIR Curve Range      |
| SWG-noro-VLP-SpyCatcher(furin)      | A3.13      |            | 261           | 0.20                  |                                              | Below FIR Curve Range      |
| SWG-noro-VLP-SpyCatcher(furin)      | A3.14      |            | 261           | 0.20                  |                                              | Below FIR Curve Range      |
| SWG-noro-VLP-SpyCatcher(furin)      | A3.15      |            | 243           | NaN                   |                                              | Below FIR Curve Range      |
| SWG-noro-VLP-SpyCatcher(furin)      | A3.16      |            | 291           | 0.70                  |                                              | Below FIR Curve Range      |
| SWG-noro-VLP-SpyCatcher(furin)      | A3.17      |            | 263           | 0.24                  |                                              | Below FIR Curve Range      |
| SWG-noro-VLP-SpyCatcher(furin)      | A3.18      |            | 242           | 0.04                  | 0.00                                         | 0.0 Below FIR Curve Range  |
| SpyTag-noro-VLP                     | A4.19      |            | 264           | 0.25                  |                                              | Below FIR Curve Range      |
| SpyTag-noro-VLP                     | A4.20      |            | 263           | 0.24                  |                                              | Below FIR Curve Range      |
| SpyTag-noro-VLP                     | A4.21      |            | 243           | NaN                   |                                              | Below FIR Curve Range      |
| SpyTag-noro-VLP                     | A4.22      |            | 209           | NaN                   |                                              | Below FIR Curve Range      |
| SpyTag-noro-VLP                     | A4.23      |            | 233           | NaN                   |                                              | Below FIR Curve Range      |
| SpyTag-noro-VLP                     | A4.24      |            | 442           | 2.99                  |                                              | In Detection Range         |
| SpyTag-noro-VLP                     | A4.28      |            | 252           | 0.11                  | 0.00                                         | 0.0 Below FIR Curve Range  |
| DIIG-noro-VLP-SpyCatcher (PCSK9)    | A5.25      |            | 319           | 1.14                  |                                              | Below Detection Range      |
| DIIG-noro-VLP-SpyCatcher (PCSK9)    | A5.31      |            | 266           | 0.29                  | 0.03                                         | 11.9 Below FIR Curve Range |
| DIIG-noro-VLP-SpyCatcher (PCSK9)    | A5.33      |            | 294           | 0.75                  |                                              | Below FIR Curve Range      |
| DIIG-noro-VLP-SpyCatcher (PCSK9)    | A5.34      |            | 289           | 0.67                  |                                              | Below FIR Curve Range      |
| DIIG-noro-VLP-SpyCatcher (PCSK9)    | A5.35      |            | 270           | 0.36                  |                                              | Below FIR Curve Range      |
| DIIG-noro-VLP-SpyCatcher (PCSK9)    | A5.36      |            | 269           | 0.34                  |                                              | Below FIR Curve Range      |
| Pdomain-noro-VLP-SpyCatcher (furin) | A6.27      |            | 229           | NaN                   |                                              | Below FIR Curve Range      |
| Pdomain-noro-VLP-SpyCatcher (furin) | A6.37      |            | 270           | 0.36                  |                                              | Below FIR Curve Range      |
| Pdomain-noro-VLP-SpyCatcher (furin) | A6.38      |            | 283           | 0.57                  |                                              | Below FIR Curve Range      |
| Pdomain-noro-VLP-SpyCatcher (furin) | A6.39      |            | 271           | 0.37                  |                                              | Below FIR Curve Range      |
| Pdomain-noro-VLP-SpyCatcher (furin) | A6.40      |            | 257           | 0.13                  |                                              | Below FIR Curve Range      |
| Pdomain-noro-VLP-SpyCatcher (furin) | A6.41      |            | 261           | 0.20                  | 0.14                                         | 71.4 Below FIR Curve Range |
| Pdomain-noro-VLP-SpyCatcher (furin) | A6.42      |            | 258           | 0.15                  |                                              | Below FIR Curve Range      |
| noro+SC-Pdom+AIOH                   | B1.1       |            | 259           | 0.17                  |                                              | Below FIR Curve Range      |
| noro+SC-Pdom+AIOH                   | B1.10      |            | 229           | NaN                   |                                              | Below FIR Curve Range      |
| noro+SC-Pdom+AIOH                   | B1.11      |            | 238           | NaN                   | NaN                                          | NaN Below FIR Curve Range  |
| noro+SC-Pdom+AIOH                   | B1.3       |            | 266           | 0.29                  |                                              | Below FIR Curve Range      |
| noro+SC-Pdom+AIOH                   | B1.30      |            | 260           | 0.18                  |                                              | Below FIR Curve Range      |
| noro+SC-Pdom/SC-Pdomain+AIOH        | B2.1       |            | 241           | NaN                   |                                              | Below FIR Curve Range      |
| noro+SC-Pdom/SC-Pdomain+AIOH        | B2.10      |            | 249           | NaN                   |                                              | Below FIR Curve Range      |
| noro+SC-Pdom/SC-Pdomain+AIOH        | B2.11      |            | 251           | 0.06                  | 0.00                                         | 0.0 Below FIR Curve Range  |
| noro+SC-Pdom/SC-Pdomain+AIOH        | B2.3       |            | 220           | NaN                   |                                              | Below FIR Curve Range      |
| noro+SC-Pdom/SC-Pdomain+AIOH        | B2.30      |            | 264           | 0.25                  |                                              | Below FIR Curve Range      |
| SpyTag-noro-VLP+AIOH                | B3.1       |            | 256           | 0.11                  |                                              | Below FIR Curve Range      |
| SpyTag-noro-VLP+AIOH                | B3.10      |            | 241           | NaN                   |                                              | Below FIR Curve Range      |
| SpyTag-noro-VLP+AIOH                | B3.11      |            | 255           | 0.09                  | 0.02                                         | 19.7 Below FIR Curve Range |
| SpyTag-noro-VLP+AIOH                | B3.3       |            | 265           | 0.27                  |                                              | Below FIR Curve Range      |
| SpyTag-noro-VLP+AIOH                | B3.30      |            | 252           | 0.04                  |                                              | Below FIR Curve Range      |
| SpyCatcher-Pdomain+AIOH             | B4.1       |            | 255           | 0.09                  |                                              | Below FIR Curve Range      |
| SpyCatcher-Pdomain+AIOH             | B4.10      |            | 238           | NaN                   |                                              | Below FIR Curve Range      |
| SpyCatcher-Pdomain+AIOH             | B4.11      |            | 290           | 0.68                  | 0.05                                         | 7.1 Below FIR Curve Range  |
| SpyCatcher-Pdomain+AIOH             | B4.3       |            | 251           | 0.02                  |                                              | Below FIR Curve Range      |
| SpyCatcher-Pdomain+AIOH             | B4.30      |            | 253           | 0.06                  |                                              | Below FIR Curve Range      |
| TBS+AIOH                            | B5.1       |            | 231           | NaN                   |                                              | Below FIR Curve Range      |
| TBS+AIOH                            | B5.10      |            | 226           | NaN                   |                                              | Below FIR Curve Range      |
| TBS+AIOH                            | B5.11      |            | 242           | NaN                   | NaN                                          | NaN Below FIR Curve Range  |
| TBS+AIOH                            | B5.3       |            | 252           | 0.04                  |                                              | Below FIR Curve Range      |

IL-4

| Group                               | Mouse code | Raw signal | Calc. Concent | STD DEV concentration | STD DEV concentration/mean concentration (%) | Detection Range            |
|-------------------------------------|------------|------------|---------------|-----------------------|----------------------------------------------|----------------------------|
| PBS                                 | A1.1       |            | 877           | NaN                   |                                              | Below FIR Curve Range      |
| PBS                                 | A1.2       |            | 1117          | 0.41                  |                                              | Below FIR Curve Range      |
| PBS                                 | A1.3       |            | 929           | NaN                   |                                              | Below FIR Curve Range      |
| PBS                                 | A1.30      |            | 1018          | NaN                   |                                              | Below FIR Curve Range      |
| PBS                                 | A1.4       |            | 1008          | NaN                   |                                              | Below FIR Curve Range      |
| PBS                                 | A1.5       |            | 1065          | 0.07                  |                                              | Below FIR Curve Range      |
| PBS                                 | A1.6       |            | 558           | NaN                   |                                              | Below FIR Curve Range      |
| PEED-noro-VLP-SpyCatcher (PCSK9)    | A2.10      |            | 825           | NaN                   |                                              | Below FIR Curve Range      |
| PEED-noro-VLP-SpyCatcher (PCSK9)    | A2.11      |            | 1005          | NaN                   |                                              | Below FIR Curve Range      |
| PEED-noro-VLP-SpyCatcher (PCSK9)    | A2.12      |            | 1042          | NaN                   |                                              | Below FIR Curve Range      |
| PEED-noro-VLP-SpyCatcher (PCSK9)    | A2.29      |            | 1123          | 0.45                  | 0.16                                         | 36.3 Below FIR Curve Range |
| PEED-noro-VLP-SpyCatcher (PCSK9)    | A2.7       |            | 888           | NaN                   |                                              | Below FIR Curve Range      |
| PEED-noro-VLP-SpyCatcher (PCSK9)    | A2.8       |            | 1271          | 1.36                  |                                              | In Detection Range         |
| PEED-noro-VLP-SpyCatcher (PCSK9)    | A2.9       |            | 976           | NaN                   |                                              | Below FIR Curve Range      |
| SWG-noro-VLP-SpyCatcher(furin)      | A3.13      |            | 1011          | NaN                   |                                              | Below FIR Curve Range      |
| SWG-noro-VLP-SpyCatcher(furin)      | A3.14      |            | 1056          | 0.00                  |                                              | Below FIR Curve Range      |
| SWG-noro-VLP-SpyCatcher(furin)      | A3.15      |            | 1016          | NaN                   |                                              | Below FIR Curve Range      |
| SWG-noro-VLP-SpyCatcher(furin)      | A3.16      |            | 1137          | 0.54                  |                                              | Below FIR Curve Range      |
| SWG-noro-VLP-SpyCatcher(furin)      | A3.17      |            | 1050          | NaN                   |                                              | Below FIR Curve Range      |
| SWG-noro-VLP-SpyCatcher(furin)      | A3.18      |            | 1007          | NaN                   | NaN                                          | NaN Below FIR Curve Range  |
| SpyTag-noro-VLP                     | A4.19      |            | 1024          | NaN                   |                                              | Below FIR Curve Range      |
| SpyTag-noro-VLP                     | A4.20      |            | 1045          | NaN                   |                                              | Below FIR Curve Range      |
| SpyTag-noro-VLP                     | A4.21      |            | 945           | NaN                   |                                              | Below FIR Curve Range      |
| SpyTag-noro-VLP                     | A4.22      |            | 1038          | NaN                   |                                              | Below FIR Curve Range      |
| SpyTag-noro-VLP                     | A4.23      |            | 915           | NaN                   |                                              | Below FIR Curve Range      |
| SpyTag-noro-VLP                     | A4.24      |            | 1674          | 3.69                  |                                              | In Detection Range         |
| SpyTag-noro-VLP                     | A4.28      |            | 1088          | 0.65                  | 0.00                                         | 0.0 Below FIR Curve Range  |
| DIIG-noro-VLP-SpyCatcher (PCSK9)    | A5.25      |            | 1030          | NaN                   |                                              | Below FIR Curve Range      |
| DIIG-noro-VLP-SpyCatcher (PCSK9)    | A5.31      |            | 1066          | 0.16                  | 0.00                                         | 0.0 Below FIR Curve Range  |
| DIIG-noro-VLP-SpyCatcher (PCSK9)    | A5.33      |            | 1070          | 0.10                  |                                              | Below FIR Curve Range      |
| DIIG-noro-VLP-SpyCatcher (PCSK9)    | A5.34      |            | 955           | NaN                   |                                              | Below FIR Curve Range      |
| DIIG-noro-VLP-SpyCatcher (PCSK9)    | A5.35      |            | 1035          | NaN                   |                                              | Below FIR Curve Range      |
| DIIG-noro-VLP-SpyCatcher (PCSK9)    | A5.36      |            | 1063          | 0.06                  |                                              | Below FIR Curve Range      |
| Pdomain-noro-VLP-SpyCatcher (furin) | A6.27      |            | 1043          | NaN                   |                                              | Below FIR Curve Range      |
| Pdomain-noro-VLP-SpyCatcher (furin) | A6.37      |            | 1038          | NaN                   |                                              | Below FIR Curve Range      |
| Pdomain-noro-VLP-SpyCatcher (furin) | A6.38      |            | 1139          | 0.55                  |                                              | Below FIR Curve Range      |
| Pdomain-noro-VLP-SpyCatcher (furin) | A6.39      |            | 1013          | NaN                   |                                              | Below FIR Curve Range      |
| Pdomain-noro-VLP-SpyCatcher (furin) | A6.40      |            | 1125          | 0.46                  |                                              | Below FIR Curve Range      |
| Pdomain-noro-VLP-SpyCatcher (furin) | A6.41      |            | 1052          | 0.06                  | 0.00                                         | 0.0 Below FIR Curve Range  |
| Pdomain-noro-VLP-SpyCatcher (furin) | A6.42      |            | 912           | NaN                   |                                              | Below FIR Curve Range      |
| noro+SC-Pdom+AIOH                   | B1.1       |            | 733           | NaN                   |                                              | Below FIR Curve Range      |
| noro+SC-Pdom+AIOH                   | B1.10      |            | 865           | NaN                   |                                              | Below FIR Curve Range      |
| noro+SC-Pdom+AIOH                   | B1.11      |            | 643           | NaN                   | NaN                                          | NaN Below FIR Curve Range  |
| noro+SC-Pdom+AIOH                   | B1.3       |            | 725           | NaN                   |                                              | Below FIR Curve Range      |
| noro+SC-Pdom+AIOH                   | B1.30      |            | 545           | NaN                   |                                              | Below FIR Curve Range      |
| noro+SC-Pdom/SC-Pdomain+AIOH        | B2.1       |            | 777           | NaN                   |                                              | Below FIR Curve Range      |
| noro+SC-Pdom/SC-Pdomain+AIOH        | B2.10      |            | 861           | NaN                   |                                              | Below FIR Curve Range      |
| noro+SC-Pdom/SC-Pdomain+AIOH        | B2.11      |            | 891           | NaN                   | NaN                                          | NaN Below FIR Curve Range  |
| noro+SC-Pdom/SC-Pdomain+AIOH        | B2.3       |            | 804           | NaN                   |                                              | Below FIR Curve Range      |
| noro+SC-Pdom/SC-Pdomain+AIOH        | B2.30      |            | 830           | NaN                   |                                              | Below FIR Curve Range      |
| SpyTag-noro-VLP+AIOH                | B3.1       |            | 857           | NaN                   |                                              | Below FIR Curve Range      |
| SpyTag-noro-VLP+AIOH                | B3.10      |            | 851           | NaN                   |                                              | Below FIR Curve Range      |
| SpyTag-noro-VLP+AIOH                | B3.11      |            | 965           | NaN                   | NaN                                          | NaN Below FIR Curve Range  |
| SpyTag-noro-VLP+AIOH                | B3.3       |            | 814           | NaN                   |                                              | Below FIR Curve Range      |
| SpyTag-noro-VLP+AIOH                | B3.30      |            | 424           | NaN                   |                                              | Below FIR Curve Range      |
| SpyCatcher-Pdomain+AIOH             | B4.1       |            | 841           | NaN                   |                                              | Below FIR Curve Range      |
| SpyCatcher-Pdomain+AIOH             | B4.10      |            | 941           | NaN                   |                                              | Below FIR Curve Range      |
| SpyCatcher-Pdomain+AIOH             | B4.11      |            | 1145          | 0.59                  | 0.02                                         | 3.7 Below FIR Curve Range  |
| SpyCatcher-Pdomain+AIOH             | B4.3       |            | 932           | NaN                   |                                              | Below FIR Curve Range      |
| SpyCatcher-Pdomain+AIOH             | B4.30      |            | 851           | NaN                   |                                              | Below FIR Curve Range      |
| TBS+AIOH                            | B5.1       |            | 922           | NaN                   |                                              | Below FIR Curve Range      |
| TBS+AIOH                            | B5.10      |            | 962           | NaN                   |                                              | Below FIR Curve Range      |
| TBS+AIOH                            | B5.11      |            | 983           | NaN                   | NaN                                          | NaN Below FIR Curve Range  |
| TBS+AIOH                            | B5.3       |            | 980           | NaN                   |                                              | Below FIR Curve Range      |

IL-5

| Group                               | Mouse code | Raw signal | Calc. Concent | STD DEV concentration | STD DEV concentration/mean concentration (%) | Detection Range         |
|-------------------------------------|------------|------------|---------------|-----------------------|----------------------------------------------|-------------------------|
| PBS                                 | A1.1       |            | 556           | 3.62                  |                                              | In Detection Range      |
| PBS                                 | A1.2       |            | 599           | 4.26                  |                                              | In Detection Range      |
| PBS                                 | A1.3       |            | 368           | 0.88                  |                                              | Below Fit Curve Range   |
| PBS                                 | A1.30      |            | 483           | 2.49                  |                                              | In Detection Range      |
| PBS                                 | A1.4       |            | 525           | 3.15                  |                                              | In Detection Range      |
| PBS                                 | A1.5       |            | 603           | 4.31                  |                                              | In Detection Range      |
| PBS                                 | A1.6       |            | 498           | 2.73                  |                                              | In Detection Range      |
| PEED-noro-VLP-SpyCatcher (PCSK9)    | A2.10      |            | 557           | 3.64                  |                                              | In Detection Range      |
| PEED-noro-VLP-SpyCatcher (PCSK9)    | A2.11      |            | 479           | 2.42                  |                                              | In Detection Range      |
| PEED-noro-VLP-SpyCatcher (PCSK9)    | A2.12      |            | 499           | 2.74                  |                                              | In Detection Range      |
| PEED-noro-VLP-SpyCatcher (PCSK9)    | A2.29      |            | 603           | 4.30                  | 0.43                                         | 9.97 In Detection Range |
| PEED-noro-VLP-SpyCatcher (PCSK9)    | A2.7       |            | 468           | 2.25                  |                                              | In Detection Range      |
| PEED-noro-VLP-SpyCatcher (PCSK9)    | A2.8       |            | 569           | 3.81                  |                                              | In Detection Range      |
| PEED-noro-VLP-SpyCatcher (PCSK9)    | A2.9       |            | 674           | 5.33                  |                                              | In Detection Range      |
| SWG-noro-VLP-SpyCatcher(furin)      | A3.13      |            | 837           | 7.53                  |                                              | In Detection Range      |
| SWG-noro-VLP-SpyCatcher(furin)      | A3.14      |            | 513           | 2.96                  |                                              | In Detection Range      |
| SWG-noro-VLP-SpyCatcher(furin)      | A3.15      |            | 477           | 2.39                  |                                              | In Detection Range      |
| SWG-noro-VLP-SpyCatcher(furin)      | A3.16      |            | 825           | 7.37                  |                                              | In Detection Range      |
| SWG-noro-VLP-SpyCatcher(furin)      | A3.17      |            | 632           | 4.73                  |                                              | In Detection Range      |
| SWG-noro-VLP-SpyCatcher(furin)      | A3.18      |            | 512           | 2.95                  | 0.16                                         | 5.3 In Detection Range  |
| SpyTag-noro-VLP                     | A4.19      |            | 484           | 2.51                  |                                              | In Detection Range      |
| SpyTag-noro-VLP                     | A4.20      |            | 459           | 2.10                  |                                              | In Detection Range      |
| SpyTag-noro-VLP                     | A4.21      |            | 420           | 1.43                  |                                              | In Detection Range      |
| SpyTag-noro-VLP                     | A4.22      |            | 307           | NaN                   |                                              | Below Fit Curve Range   |
| SpyTag-noro-VLP                     | A4.23      |            | 424           | 1.50                  |                                              | In Detection Range      |
| SpyTag-noro-VLP                     | A4.24      |            | 1656          | 17.39                 |                                              | In Detection Range      |
| SpyTag-noro-VLP                     | A4.28      |            | 572           | 3.86                  | 0.22                                         | 5.8 In Detection Range  |
| DIIG-noro-VLP-SpyCatcher (PCSK9)    | A5.25      |            | 594           | 4.18                  |                                              | In Detection Range      |
| DIIG-noro-VLP-SpyCatcher (PCSK9)    | A5.31      |            | 596           | 4.20                  | 0.17                                         | 4.0 In Detection Range  |
| DIIG-noro-VLP-SpyCatcher (PCSK9)    | A5.33      |            | 573           | 3.87                  |                                              | In Detection Range      |
| DIIG-noro-VLP-SpyCatcher (PCSK9)    | A5.34      |            | 486           | 2.54                  |                                              | In Detection Range      |
| DIIG-noro-VLP-SpyCatcher (PCSK9)    | A5.35      |            | 589           | 4.11                  |                                              | In Detection Range      |
| DIIG-noro-VLP-SpyCatcher (PCSK9)    | A5.36      |            | 513           | 2.96                  |                                              | In Detection Range      |
| Pdomain-noro-VLP-SpyCatcher (furin) | A6.27      |            | 547           | 3.48                  |                                              | In Detection Range      |
| Pdomain-noro-VLP-SpyCatcher (furin) | A6.37      |            | 436           | 1.71                  |                                              | In Detection Range      |
| Pdomain-noro-VLP-SpyCatcher (furin) | A6.38      |            | 443           | 1.83                  |                                              | In Detection Range      |
| Pdomain-noro-VLP-SpyCatcher (furin) | A6.39      |            | 501           | 2.78                  |                                              | In Detection Range      |
| Pdomain-noro-VLP-SpyCatcher (furin) | A6.40      |            | 509           | 2.90                  |                                              | In Detection Range      |
| Pdomain-noro-VLP-SpyCatcher (furin) | A6.41      |            | 834           | 7.49                  | 0.41                                         | 5.4 In Detection Range  |
| Pdomain-noro-VLP-SpyCatcher (furin) | A6.42      |            | 513           | 2.96                  |                                              | In Detection Range      |
| noro+SC-Pdom+AIOH                   | B1.1       |            | 535           | 3.30                  |                                              | In Detection Range      |
| noro+SC-Pdom+AIOH                   | B1.10      |            | 522           | 3.10                  |                                              | In Detection Range      |
| noro+SC-Pdom+AIOH                   | B1.11      |            | 672           | 5.30                  | 0.03                                         | 0.53 In Detection Range |
| noro+SC-Pdom+AIOH                   | B1.3       |            | 567           | 3.78                  |                                              | In Detection Range      |
| noro+SC-Pdom+AIOH                   | B1.30      |            | 578           | 3.95                  |                                              | In Detection Range      |
| noro+SC-Pdom/SC-Pdomain+AIOH        | B2.1       |            | 648           | 4.96                  |                                              | In Detection Range      |
| noro+SC-Pdom/SC-Pdomain+AIOH        | B2.10      |            | 570           | 3.83                  |                                              | In Detection Range      |
| noro+SC-Pdom/SC-Pdomain+AIOH        | B2.11      |            | 591           | 4.14                  | 0.18                                         | 4.4 In Detection Range  |
| noro+SC-Pdom/SC-Pdomain+AIOH        | B2.3       |            | 420           | 1.43                  |                                              | In Detection Range      |
| noro+SC-Pdom/SC-Pdomain+AIOH        | B2.30      |            | 662           | 5.16                  |                                              | In Detection Range      |
| SpyTag-noro-VLP+AIOH                | B3.1       |            | 424           | 1.50                  |                                              | In Detection Range      |
| SpyTag-noro-VLP+AIOH                | B3.10      |            | 487           | 2.55                  |                                              | In Detection Range      |
| SpyTag-noro-VLP+AIOH                | B3.11      |            | 528           | 3.18                  | 0.05                                         | 1.6 In Detection Range  |
| SpyTag-noro-VLP+AIOH                | B3.3       |            | 899           | 8.34                  |                                              | In Detection Range      |
| SpyTag-noro-VLP+AIOH                | B3.30      |            | 612           | 4.44                  |                                              | In Detection Range      |
| SpyCatcher-Pdomain+AIOH             | B4.1       |            | 639           | 4.83                  |                                              | In Detection Range      |
| SpyCatcher-Pdomain+AIOH             | B4.10      |            | 613           | 4.46                  |                                              | In Detection Range      |
| SpyCatcher-Pdomain+AIOH             | B4.11      |            | 785           | 6.76                  | 0.07                                         | 1.0 In Detection Range  |
| SpyCatcher-Pdomain+AIOH             | B4.3       |            | 744           | 6.29                  |                                              | In Detection Range      |
| SpyCatcher-Pdomain+AIOH             | B4.30      |            | 500           | 2.76                  |                                              | In Detection Range      |
| TBS+AIOH                            | B5.1       |            | 534           | 3.29                  |                                              | In Detection Range      |
| TBS+AIOH                            | B5.10      |            | 506           | 2.85                  |                                              | In Detection Range      |
| TBS+AIOH                            | B5.11      |            | 522           | 3.09                  | 0.16                                         | 5.2 In Detection Range  |
| TBS+AIOH                            | B5.3       |            | 462           | 2.15                  |                                              | In Detection Range      |



IL-6

| Group                               | Mouse code | Raw signal | Calc. Concent | STD DEV concentration | STD DEV concentration/mean concentration (%) | Detection Range            |
|-------------------------------------|------------|------------|---------------|-----------------------|----------------------------------------------|----------------------------|
| PBS                                 | A1.1       |            | 375           | 6.82                  |                                              | In Detection Range         |
| PBS                                 | A1.2       |            | 408           | 9.83                  |                                              | In Detection Range         |
| PBS                                 | A1.3       |            | 304           | NaN                   |                                              | Below Fit Curve Range      |
| PBS                                 | A1.30      |            | 331           | 2.56                  |                                              | Below Detection Range      |
| PBS                                 | A1.4       |            | 356           | 5.03                  |                                              | Below Detection Range      |
| PBS                                 | A1.5       |            | 338           | 3.27                  |                                              | Below Detection Range      |
| PBS                                 | A1.6       |            | 366           | 5.98                  |                                              | In Detection Range         |
| PEED-noro-VLP-SpyCatcher (PCSK9)    | A2.10      |            | 376           | 6.91                  |                                              | In Detection Range         |
| PEED-noro-VLP-SpyCatcher (PCSK9)    | A2.11      |            | 345           | 3.96                  |                                              | Below Detection Range      |
| PEED-noro-VLP-SpyCatcher (PCSK9)    | A2.12      |            | 326           | 2.04                  |                                              | Below Fit Curve Range      |
| PEED-noro-VLP-SpyCatcher (PCSK9)    | A2.29      |            | 342           | 3.65                  | 1.19                                         | 32.6 Below Detection Range |
| PEED-noro-VLP-SpyCatcher (PCSK9)    | A2.7       |            | 373           | 6.64                  |                                              | In Detection Range         |
| PEED-noro-VLP-SpyCatcher (PCSK9)    | A2.8       |            | 330           | 2.46                  |                                              | Below Detection Range      |
| PEED-noro-VLP-SpyCatcher (PCSK9)    | A2.9       |            | 386           | 7.84                  |                                              | In Detection Range         |
| SWG-noro-VLP-SpyCatcher(furin)      | A3.13      |            | 358           | 5.22                  |                                              | Below Detection Range      |
| SWG-noro-VLP-SpyCatcher(furin)      | A3.14      |            | 360           | 5.41                  |                                              | Below Detection Range      |
| SWG-noro-VLP-SpyCatcher(furin)      | A3.15      |            | 338           | 3.27                  |                                              | Below Detection Range      |
| SWG-noro-VLP-SpyCatcher(furin)      | A3.16      |            | 576           | 24.08                 |                                              | In Detection Range         |
| SWG-noro-VLP-SpyCatcher(furin)      | A3.17      |            | 351           | 4.55                  |                                              | Below Detection Range      |
| SWG-noro-VLP-SpyCatcher(furin)      | A3.18      |            | 368           | 6.17                  | 0.19                                         | 3.0 In Detection Range     |
| SpyTag-noro-VLP                     | A4.19      |            | 326           | 2.04                  |                                              | Below Fit Curve Range      |
| SpyTag-noro-VLP                     | A4.20      |            | 316           | 0.96                  |                                              | Below Fit Curve Range      |
| SpyTag-noro-VLP                     | A4.21      |            | 297           | NaN                   |                                              | Below Fit Curve Range      |
| SpyTag-noro-VLP                     | A4.22      |            | 287           | NaN                   |                                              | Below Fit Curve Range      |
| SpyTag-noro-VLP                     | A4.23      |            | 328           | 2.25                  |                                              | Below Fit Curve Range      |
| SpyTag-noro-VLP                     | A4.24      |            | 1685          | 106.42                |                                              | In Detection Range         |
| SpyTag-noro-VLP                     | A4.28      |            | 326           | 1.99                  | 0.05                                         | 2.6 Below Fit Curve Range  |
| DIIG-noro-VLP-SpyCatcher (PCSK9)    | A5.25      |            | 526           | 19.96                 |                                              | In Detection Range         |
| DIIG-noro-VLP-SpyCatcher (PCSK9)    | A5.31      |            | 342           | 3.66                  | 0.59                                         | 16.2 Below Detection Range |
| DIIG-noro-VLP-SpyCatcher (PCSK9)    | A5.33      |            | 314           | 0.73                  |                                              | Below Fit Curve Range      |
| DIIG-noro-VLP-SpyCatcher (PCSK9)    | A5.34      |            | 363           | 5.70                  |                                              | Below Detection Range      |
| DIIG-noro-VLP-SpyCatcher (PCSK9)    | A5.35      |            | 363           | 5.70                  |                                              | Below Detection Range      |
| DIIG-noro-VLP-SpyCatcher (PCSK9)    | A5.36      |            | 345           | 3.96                  |                                              | Below Detection Range      |
| Pdomain-noro-VLP-SpyCatcher (furin) | A6.27      |            | 335           | 2.97                  |                                              | Below Detection Range      |
| Pdomain-noro-VLP-SpyCatcher (furin) | A6.37      |            | 344           | 3.87                  |                                              | Below Detection Range      |
| Pdomain-noro-VLP-SpyCatcher (furin) | A6.38      |            | 337           | 3.17                  |                                              | Below Detection Range      |
| Pdomain-noro-VLP-SpyCatcher (furin) | A6.39      |            | 302           | NaN                   |                                              | Below Fit Curve Range      |
| Pdomain-noro-VLP-SpyCatcher (furin) | A6.40      |            | 351           | 4.55                  |                                              | Below Detection Range      |
| Pdomain-noro-VLP-SpyCatcher (furin) | A6.41      |            | 364           | 5.74                  | 0.43                                         | 7.4 Below Detection Range  |
| Pdomain-noro-VLP-SpyCatcher (furin) | A6.42      |            | 340           | 3.47                  |                                              | Below Detection Range      |
| noro+SC-Pdom+AIOH                   | B1.1       |            | 329           | 2.36                  |                                              | Below Detection Range      |
| noro+SC-Pdom+AIOH                   | B1.10      |            | 325           | 1.94                  |                                              | Below Fit Curve Range      |
| noro+SC-Pdom+AIOH                   | B1.11      |            | 349           | 4.28                  | 1.51                                         | 35.4 Below Detection Range |
| noro+SC-Pdom+AIOH                   | B1.3       |            | 470           | 15.24                 |                                              | In Detection Range         |
| noro+SC-Pdom+AIOH                   | B1.30      |            | 386           | 7.84                  |                                              | In Detection Range         |
| noro+SC-Pdom/SC-Pdomain+AIOH        | B2.1       |            | 339           | 3.37                  |                                              | Below Detection Range      |
| noro+SC-Pdom/SC-Pdomain+AIOH        | B2.10      |            | 369           | 6.26                  |                                              | In Detection Range         |
| noro+SC-Pdom/SC-Pdomain+AIOH        | B2.11      |            | 413           | 10.27                 | 0.00                                         | 0.0 In Detection Range     |
| noro+SC-Pdom/SC-Pdomain+AIOH        | B2.3       |            | 294           | NaN                   |                                              | Below Fit Curve Range      |
| noro+SC-Pdom/SC-Pdomain+AIOH        | B2.30      |            | 347           | 4.16                  |                                              | Below Detection Range      |
| SpyTag-noro-VLP+AIOH                | B3.1       |            | 324           | 1.83                  |                                              | Below Fit Curve Range      |
| SpyTag-noro-VLP+AIOH                | B3.10      |            | 323           | 1.72                  |                                              | Below Fit Curve Range      |
| SpyTag-noro-VLP+AIOH                | B3.11      |            | 359           | 5.27                  | 0.33                                         | 6.3 Below Detection Range  |
| SpyTag-noro-VLP+AIOH                | B3.3       |            | 307           | NaN                   |                                              | Below Fit Curve Range      |
| SpyTag-noro-VLP+AIOH                | B3.30      |            | 349           | 4.36                  |                                              | Below Detection Range      |
| SpyCatcher-Pdomain+AIOH             | B4.1       |            | 325           | 1.94                  |                                              | Below Fit Curve Range      |
| SpyCatcher-Pdomain+AIOH             | B4.10      |            | 329           | 2.36                  |                                              | Below Detection Range      |
| SpyCatcher-Pdomain+AIOH             | B4.11      |            | 560           | 22.73                 | 0.53                                         | 2.3 In Detection Range     |
| SpyCatcher-Pdomain+AIOH             | B4.3       |            | 310           | 0.24                  |                                              | Below Fit Curve Range      |
| SpyCatcher-Pdomain+AIOH             | B4.30      |            | 328           | 2.25                  |                                              | Below Fit Curve Range      |
| TBS+AIOH                            | B5.1       |            | 344           | 3.87                  |                                              | Below Detection Range      |
| TBS+AIOH                            | B5.10      |            | 369           | 6.26                  |                                              | In Detection Range         |
| TBS+AIOH                            | B5.11      |            | 358           | 5.17                  | 0.14                                         | 2.8 Below Detection Range  |
| TBS+AIOH                            | B5.3       |            | 352           | 4.65                  |                                              | Below Detection Range      |

## KCGRO

| Group                               | Mouse code | Raw signal | Calc. Concent | STD DEV concentration | STD DEV concentration/mean concentration (%) | Detection Range        |
|-------------------------------------|------------|------------|---------------|-----------------------|----------------------------------------------|------------------------|
| PBS                                 | A1.1       |            | 9698          | 39.23                 |                                              | In Detection Range     |
| PBS                                 | A1.2       |            | 8033          | 32.93                 |                                              | In Detection Range     |
| PBS                                 | A1.3       |            | 5213          | 45.65                 |                                              | In Detection Range     |
| PBS                                 | A1.30      |            | 10902         | 43.71                 |                                              | In Detection Range     |
| PBS                                 | A1.4       |            | 19380         | 74.10                 |                                              | In Detection Range     |
| PBS                                 | A1.5       |            | 14935         | 58.38                 |                                              | In Detection Range     |
| PBS                                 | A1.6       |            | 10141         | 40.88                 |                                              | In Detection Range     |
| PEED-noro-VLP-SpyCatcher (PCSK9)    | A2.10      |            | 15167         | 59.21                 |                                              | In Detection Range     |
| PEED-noro-VLP-SpyCatcher (PCSK9)    | A2.11      |            | 9782          | 39.54                 |                                              | In Detection Range     |
| PEED-noro-VLP-SpyCatcher (PCSK9)    | A2.12      |            | 14979         | 58.54                 |                                              | In Detection Range     |
| PEED-noro-VLP-SpyCatcher (PCSK9)    | A2.29      |            | 13258         | 52.33                 | 0.04                                         | 0.1 In Detection Range |
| PEED-noro-VLP-SpyCatcher (PCSK9)    | A2.7       |            | 12170         | 48.37                 |                                              | In Detection Range     |
| PEED-noro-VLP-SpyCatcher (PCSK9)    | A2.8       |            | 10691         | 42.92                 |                                              | In Detection Range     |
| PEED-noro-VLP-SpyCatcher (PCSK9)    | A2.9       |            | 8519          | 34.78                 |                                              | In Detection Range     |
| SWG-noro-VLP-SpyCatcher(furin)      | A3.13      |            | 13339         | 52.63                 |                                              | In Detection Range     |
| SWG-noro-VLP-SpyCatcher(furin)      | A3.14      |            | 16486         | 63.91                 |                                              | In Detection Range     |
| SWG-noro-VLP-SpyCatcher(furin)      | A3.15      |            | 12944         | 51.19                 |                                              | In Detection Range     |
| SWG-noro-VLP-SpyCatcher(furin)      | A3.16      |            | 15878         | 61.75                 |                                              | In Detection Range     |
| SWG-noro-VLP-SpyCatcher(furin)      | A3.17      |            | 14424         | 56.54                 |                                              | In Detection Range     |
| SWG-noro-VLP-SpyCatcher(furin)      | A3.18      |            | 12689         | 50.26                 | 0.99                                         | 2.0 In Detection Range |
| SpyTag-noro-VLP                     | A4.19      |            | 9659          | 39.08                 |                                              | In Detection Range     |
| SpyTag-noro-VLP                     | A4.20      |            | 9578          | 38.78                 |                                              | In Detection Range     |
| SpyTag-noro-VLP                     | A4.21      |            | 12558         | 49.79                 |                                              | In Detection Range     |
| SpyTag-noro-VLP                     | A4.22      |            | 173           | NaN                   |                                              | Below Fit Curve Range  |
| SpyTag-noro-VLP                     | A4.23      |            | 14139         | 55.52                 |                                              | In Detection Range     |
| SpyTag-noro-VLP                     | A4.24      |            | 9964          | 40.22                 |                                              | In Detection Range     |
| SpyTag-noro-VLP                     | A4.28      |            | 11384         | 45.47                 | 2.95                                         | 6.5 In Detection Range |
| DIIG-noro-VLP-SpyCatcher (PCSK9)    | A5.25      |            | 24725         | 92.53                 |                                              | In Detection Range     |
| DIIG-noro-VLP-SpyCatcher (PCSK9)    | A5.31      |            | 12882         | 50.96                 | 2.79                                         | 5.5 In Detection Range |
| DIIG-noro-VLP-SpyCatcher (PCSK9)    | A5.33      |            | 9653          | 39.06                 |                                              | In Detection Range     |
| DIIG-noro-VLP-SpyCatcher (PCSK9)    | A5.34      |            | 9548          | 38.66                 |                                              | In Detection Range     |
| DIIG-noro-VLP-SpyCatcher (PCSK9)    | A5.35      |            | 9139          | 37.13                 |                                              | In Detection Range     |
| DIIG-noro-VLP-SpyCatcher (PCSK9)    | A5.36      |            | 9861          | 39.83                 |                                              | In Detection Range     |
| Pdomain-noro-VLP-SpyCatcher (furin) | A6.27      |            | 12356         | 49.05                 |                                              | In Detection Range     |
| Pdomain-noro-VLP-SpyCatcher (furin) | A6.37      |            | 11130         | 44.55                 |                                              | In Detection Range     |
| Pdomain-noro-VLP-SpyCatcher (furin) | A6.38      |            | 9406          | 38.13                 |                                              | In Detection Range     |
| Pdomain-noro-VLP-SpyCatcher (furin) | A6.39      |            | 10848         | 43.51                 |                                              | In Detection Range     |
| Pdomain-noro-VLP-SpyCatcher (furin) | A6.40      |            | 13106         | 51.78                 |                                              | In Detection Range     |
| Pdomain-noro-VLP-SpyCatcher (furin) | A6.41      |            | 13656         | 53.77                 | 0.79                                         | 1.5 In Detection Range |
| Pdomain-noro-VLP-SpyCatcher (furin) | A6.42      |            | 11610         | 46.32                 |                                              | In Detection Range     |
| noro+SC-Pdom+AIOH                   | B1.1       |            | 8365          | 34.20                 |                                              | In Detection Range     |
| noro+SC-Pdom+AIOH                   | B1.10      |            | 9820          | 39.68                 |                                              | In Detection Range     |
| noro+SC-Pdom+AIOH                   | B1.11      |            | 21337         | 80.89                 | 0.09                                         | 0.1 In Detection Range |
| noro+SC-Pdom+AIOH                   | B1.3       |            | 25017         | 93.52                 |                                              | In Detection Range     |
| noro+SC-Pdom+AIOH                   | B1.30      |            | 9051          | 36.79                 |                                              | In Detection Range     |
| noro+SC-Pdom/SC-Pdomain+AIOH        | B2.1       |            | 13679         | 53.86                 |                                              | In Detection Range     |
| noro+SC-Pdom/SC-Pdomain+AIOH        | B2.10      |            | 12044         | 47.91                 |                                              | In Detection Range     |
| noro+SC-Pdom/SC-Pdomain+AIOH        | B2.11      |            | 5997          | 25.05                 | 1.15                                         | 4.6 In Detection Range |
| noro+SC-Pdom/SC-Pdomain+AIOH        | B2.3       |            | 12020         | 47.82                 |                                              | In Detection Range     |
| noro+SC-Pdom/SC-Pdomain+AIOH        | B2.30      |            | 17795         | 68.54                 |                                              | In Detection Range     |
| SpyTag-noro-VLP+AIOH                | B3.1       |            | 16233         | 63.01                 |                                              | In Detection Range     |
| SpyTag-noro-VLP+AIOH                | B3.10      |            | 7859          | 32.27                 |                                              | In Detection Range     |
| SpyTag-noro-VLP+AIOH                | B3.11      |            | 12299         | 48.84                 | 0.17                                         | 0.3 In Detection Range |
| SpyTag-noro-VLP+AIOH                | B3.3       |            | 18228         | 70.06                 |                                              | In Detection Range     |
| SpyTag-noro-VLP+AIOH                | B3.30      |            | 9724          | 39.32                 |                                              | In Detection Range     |
| SpyCatcher-Pdomain+AIOH             | B4.1       |            | 16097         | 62.53                 |                                              | In Detection Range     |
| SpyCatcher-Pdomain+AIOH             | B4.10      |            | 10091         | 40.69                 |                                              | In Detection Range     |
| SpyCatcher-Pdomain+AIOH             | B4.11      |            | 13494         | 53.19                 | 0.19                                         | 0.4 In Detection Range |
| SpyCatcher-Pdomain+AIOH             | B4.3       |            | 10504         | 42.23                 |                                              | In Detection Range     |
| SpyCatcher-Pdomain+AIOH             | B4.30      |            | 17881         | 68.84                 |                                              | In Detection Range     |
| TBS+AIOH                            | B5.1       |            | 8511          | 34.75                 |                                              | In Detection Range     |
| TBS+AIOH                            | B5.10      |            | 9132          | 37.10                 |                                              | In Detection Range     |
| TBS+AIOH                            | B5.11      |            | 11786         | 46.96                 | 1.49                                         | 3.2 In Detection Range |
| TBS+AIOH                            | B5.3       |            | 15716         | 61.17                 |                                              | In Detection Range     |

## INF

| Group                               | Mouse code | Raw signal | Calc. Concent | STD DEV concentration | STD DEV concentration/mean concentration (%) | Detection Range         |
|-------------------------------------|------------|------------|---------------|-----------------------|----------------------------------------------|-------------------------|
| PBS                                 | A1.1       |            | 1717          | 9.80                  |                                              | In Detection Range      |
| PBS                                 | A1.2       |            | 1742          | 9.97                  |                                              | In Detection Range      |
| PBS                                 | A1.3       |            | 869           | 8.74                  |                                              | In Detection Range      |
| PBS                                 | A1.30      |            | 1552          | 8.73                  |                                              | In Detection Range      |
| PBS                                 | A1.4       |            | 1431          | 7.94                  |                                              | In Detection Range      |
| PBS                                 | A1.5       |            | 1305          | 7.11                  |                                              | In Detection Range      |
| PBS                                 | A1.6       |            | 1475          | 8.23                  |                                              | In Detection Range      |
| PEED-noro-VLP-SpyCatcher (PCSK9)    | A2.10      |            | 1356          | 7.44                  |                                              | In Detection Range      |
| PEED-noro-VLP-SpyCatcher (PCSK9)    | A2.11      |            | 1213          | 6.50                  |                                              | In Detection Range      |
| PEED-noro-VLP-SpyCatcher (PCSK9)    | A2.12      |            | 1038          | 5.34                  |                                              | In Detection Range      |
| PEED-noro-VLP-SpyCatcher (PCSK9)    | A2.29      |            | 1148          | 6.07                  | 0.02                                         | 0.3 In Detection Range  |
| PEED-noro-VLP-SpyCatcher (PCSK9)    | A2.7       |            | 1276          | 6.92                  |                                              | In Detection Range      |
| PEED-noro-VLP-SpyCatcher (PCSK9)    | A2.8       |            | 1552          | 8.73                  |                                              | In Detection Range      |
| PEED-noro-VLP-SpyCatcher (PCSK9)    | A2.9       |            | 1725          | 9.86                  |                                              | In Detection Range      |
| SWG-noro-VLP-SpyCatcher(furin)      | A3.13      |            | 1195          | 6.38                  |                                              | In Detection Range      |
| SWG-noro-VLP-SpyCatcher(furin)      | A3.14      |            | 1285          | 6.98                  |                                              | In Detection Range      |
| SWG-noro-VLP-SpyCatcher(furin)      | A3.15      |            | 1202          | 6.43                  |                                              | In Detection Range      |
| SWG-noro-VLP-SpyCatcher(furin)      | A3.16      |            | 1618          | 9.16                  |                                              | In Detection Range      |
| SWG-noro-VLP-SpyCatcher(furin)      | A3.17      |            | 1764          | 10.11                 |                                              | In Detection Range      |
| SWG-noro-VLP-SpyCatcher(furin)      | A3.18      |            | 1251          | 6.75                  | 0.63                                         | 9.4 In Detection Range  |
| SpyTag-noro-VLP                     | A4.19      |            | 1405          | 7.77                  |                                              | In Detection Range      |
| SpyTag-noro-VLP                     | A4.20      |            | 1405          | 7.77                  |                                              | In Detection Range      |
| SpyTag-noro-VLP                     | A4.21      |            | 1229          | 6.61                  |                                              | In Detection Range      |
| SpyTag-noro-VLP                     | A4.22      |            | 275           | NaN                   |                                              | Below Fit Curve Range   |
| SpyTag-noro-VLP                     | A4.23      |            | 1003          | 5.10                  |                                              | In Detection Range      |
| SpyTag-noro-VLP                     | A4.24      |            | 1320          | 7.21                  |                                              | In Detection Range      |
| SpyTag-noro-VLP                     | A4.28      |            | 1324          | 7.23                  | 0.50                                         | 6.9 In Detection Range  |
| DIIG-noro-VLP-SpyCatcher (PCSK9)    | A5.25      |            | 1915          | 11.09                 |                                              | In Detection Range      |
| DIIG-noro-VLP-SpyCatcher (PCSK9)    | A5.31      |            | 1603          | 9.06                  | 1.17                                         | 12.9 In Detection Range |
| DIIG-noro-VLP-SpyCatcher (PCSK9)    | A5.33      |            | 1357          | 7.45                  |                                              | In Detection Range      |
| DIIG-noro-VLP-SpyCatcher (PCSK9)    | A5.34      |            | 1355          | 7.44                  |                                              | In Detection Range      |
| DIIG-noro-VLP-SpyCatcher (PCSK9)    | A5.35      |            | 1341          | 7.35                  |                                              | In Detection Range      |
| DIIG-noro-VLP-SpyCatcher (PCSK9)    | A5.36      |            | 919           | 4.54                  |                                              | In Detection Range      |
| Pdomain-noro-VLP-SpyCatcher (furin) | A6.27      |            | 1513          | 8.47                  |                                              | In Detection Range      |
| Pdomain-noro-VLP-SpyCatcher (furin) | A6.37      |            | 1300          | 7.08                  |                                              | In Detection Range      |
| Pdomain-noro-VLP-SpyCatcher (furin) | A6.38      |            | 1391          | 7.68                  |                                              | In Detection Range      |
| Pdomain-noro-VLP-SpyCatcher (furin) | A6.39      |            | 1348          | 7.39                  |                                              | In Detection Range      |
| Pdomain-noro-VLP-SpyCatcher (furin) | A6.40      |            | 1200          | 6.41                  |                                              | In Detection Range      |
| Pdomain-noro-VLP-SpyCatcher (furin) | A6.41      |            | 1181          | 6.29                  | 0.05                                         | 0.8 In Detection Range  |
| Pdomain-noro-VLP-SpyCatcher (furin) | A6.42      |            | 1005          | 5.12                  |                                              | In Detection Range      |
| noro+SC-Pdom+AIOH                   | B1.1       |            | 1251          | 6.75                  |                                              | In Detection Range      |
| noro+SC-Pdom+AIOH                   | B1.10      |            | 1238          | 6.67                  |                                              | In Detection Range      |
| noro+SC-Pdom+AIOH                   | B1.11      |            | 1568          | 8.83                  | 0.33                                         | 3.7 In Detection Range  |
| noro+SC-Pdom+AIOH                   | B1.3       |            | 1767          | 10.13                 |                                              | In Detection Range      |
| noro+SC-Pdom+AIOH                   | B1.30      |            | 1722          | 9.84                  |                                              | In Detection Range      |
| noro+SC-Pdom/SC-Pdomain+AIOH        | B2.1       |            | 1477          | 8.24                  |                                              | In Detection Range      |
| noro+SC-Pdom/SC-Pdomain+AIOH        | B2.10      |            | 1529          | 8.58                  |                                              | In Detection Range      |
| noro+SC-Pdom/SC-Pdomain+AIOH        | B2.11      |            | 1342          | 7.35                  | 0.21                                         | 2.9 In Detection Range  |
| noro+SC-Pdom/SC-Pdomain+AIOH        | B2.3       |            | 1484          | 8.28                  |                                              | In Detection Range      |
| noro+SC-Pdom/SC-Pdomain+AIOH        | B2.30      |            | 1399          | 7.73                  |                                              | In Detection Range      |
| SpyTag-noro-VLP+AIOH                | B3.1       |            | 1604          | 9.07                  |                                              | In Detection Range      |
| SpyTag-noro-VLP+AIOH                | B3.10      |            | 1151          | 6.09                  |                                              | In Detection Range      |
| SpyTag-noro-VLP+AIOH                | B3.11      |            | 1529          | 8.58                  | 0.14                                         | 1.6 In Detection Range  |
| SpyTag-noro-VLP+AIOH                | B3.3       |            | 1746          | 9.99                  |                                              | In Detection Range      |
| SpyTag-noro-VLP+AIOH                | B3.30      |            | 1272          | 6.89                  |                                              | In Detection Range      |
| SpyCatcher-Pdomain+AIOH             | B4.1       |            | 1459          | 8.12                  |                                              | In Detection Range      |
| SpyCatcher-Pdomain+AIOH             | B4.10      |            | 1315          | 7.17                  |                                              | In Detection Range      |
| SpyCatcher-Pdomain+AIOH             | B4.11      |            | 1987          | 11.55                 | 0.40                                         | 3.5 In Detection Range  |
| SpyCatcher-Pdomain+AIOH             | B4.3       |            | 1144          | 6.04                  |                                              | In Detection Range      |
| SpyCatcher-Pdomain+AIOH             | B4.30      |            | 1630          | 9.24                  |                                              | In Detection Range      |
| TBS+AIOH                            | B5.1       |            | 1244          | 6.71                  |                                              | In Detection Range      |
| TBS+AIOH                            | B5.10      |            | 1675          | 9.53                  |                                              | In Detection Range      |
| TBS+AIOH                            | B5.11      |            | 1647          | 9.34                  | 0.57                                         | 6.1 In Detection Range  |
| TBS+AIOH                            | B5.3       |            | 1391          | 7.68                  |                                              | In Detection Range      |
